# Supplementary material for: Copy Number Analysis Identifies Novel Interactions Between Genomic Loci in Ovarian Cancer
Source: PLOS journal article supplement (doi:10.1371/journal.pone.0011408), 2010-09-10

**A**

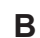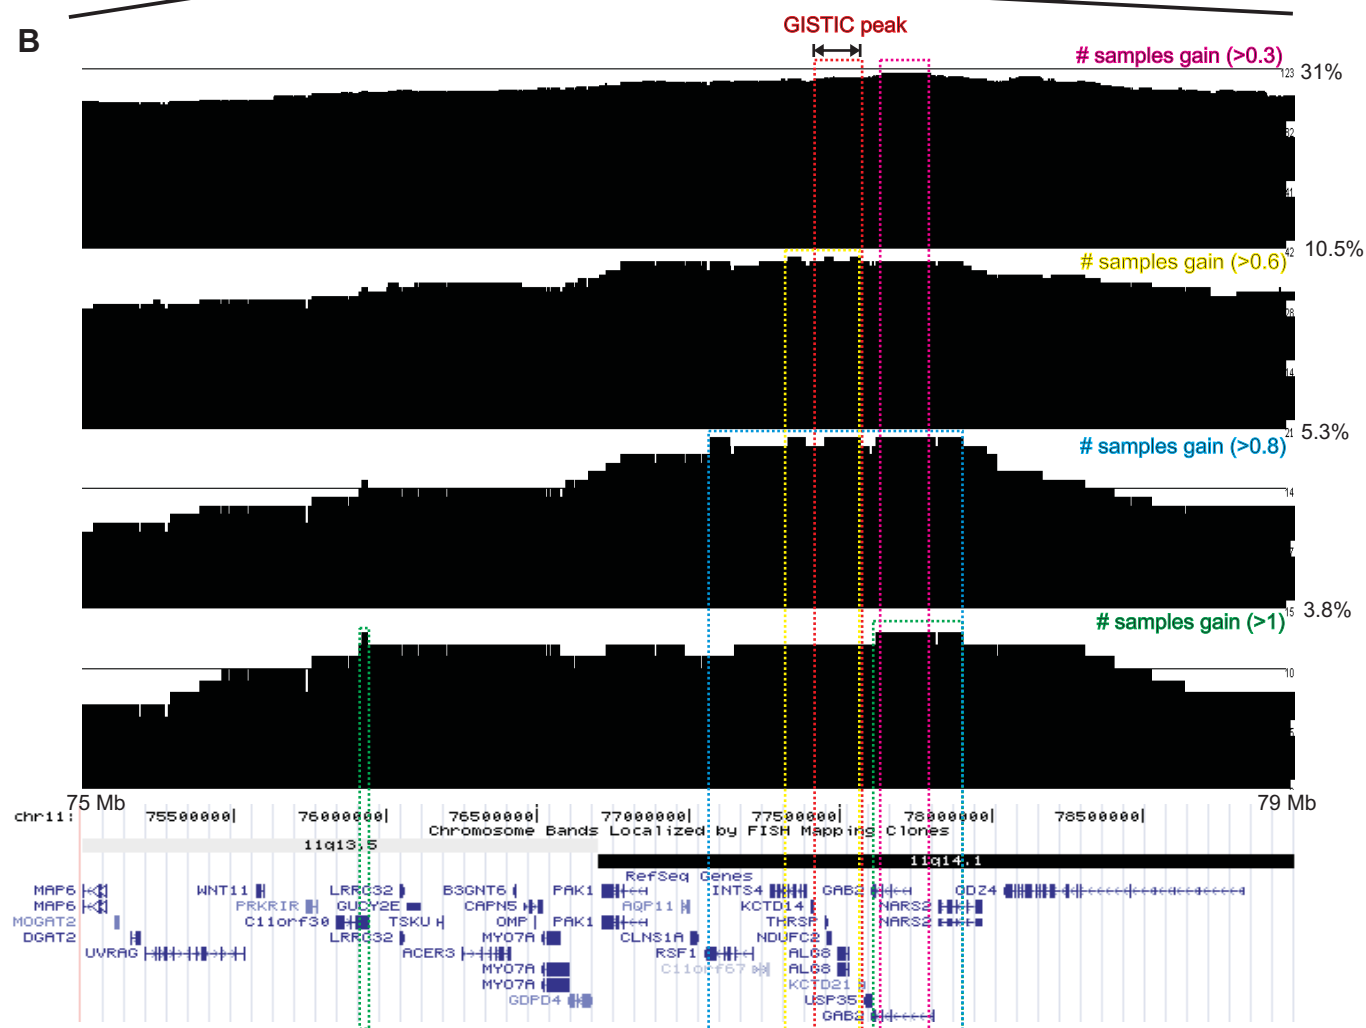

Supplement: S4 (10.1371/journal.pone.0011408.s004) [file journal.pone.0011408.s004]
